# Supplementary material
Source: MDPI journal article supplement (https://www.mdpi.com/2073-4441/11/1/84)

# Supplementary Materials: Quantification of Recharge and Runoff from Rainfall Using New GIS Tool: Example of the Gaza Strip Aquifer

Ashraf M. Mushtaha <sup>1,2,\*</sup>, Marc Van Camp <sup>2</sup> and Kristine Walraevens <sup>2</sup>

<sup>1</sup> Environmental and MIS Department, Coastal Municipalities Water Utility (CMWU), Gaza Strip, Palestine

<sup>2</sup> Laboratory for Applied Geology and Hydrogeology, Ghent University, Krijgslaan 281-S8, 9000 Gent, Belgium; marc.vancamp@ugent.be (M.V.C.); Kristine.Walraevens@UGent.be (K.W.)

\* Correspondence: amushtaha@gmail.com

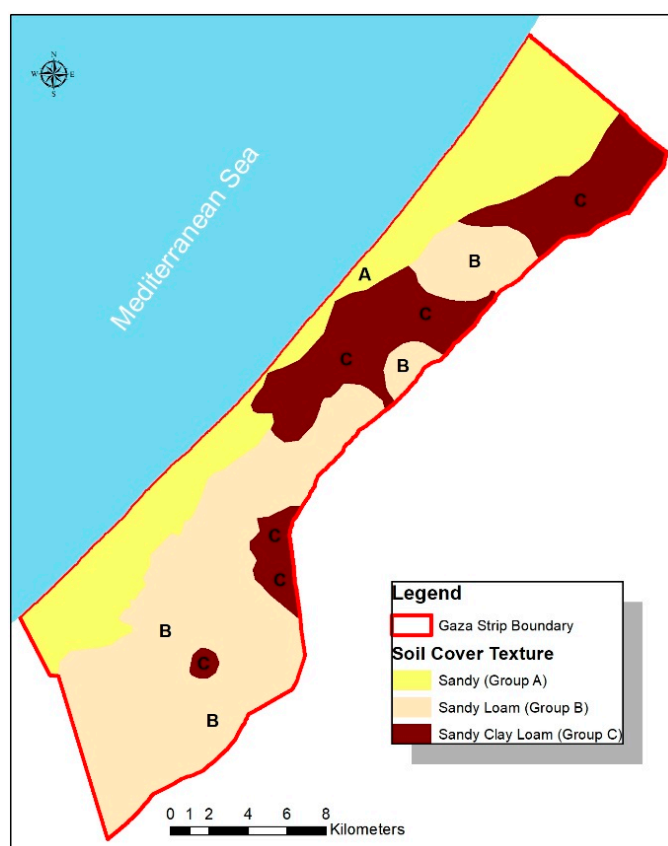

**Figure S1.** Soil texture map (updated after: MOPIC, 1995; Goris & Samian, 2001; Mushtaha et al., 2018).

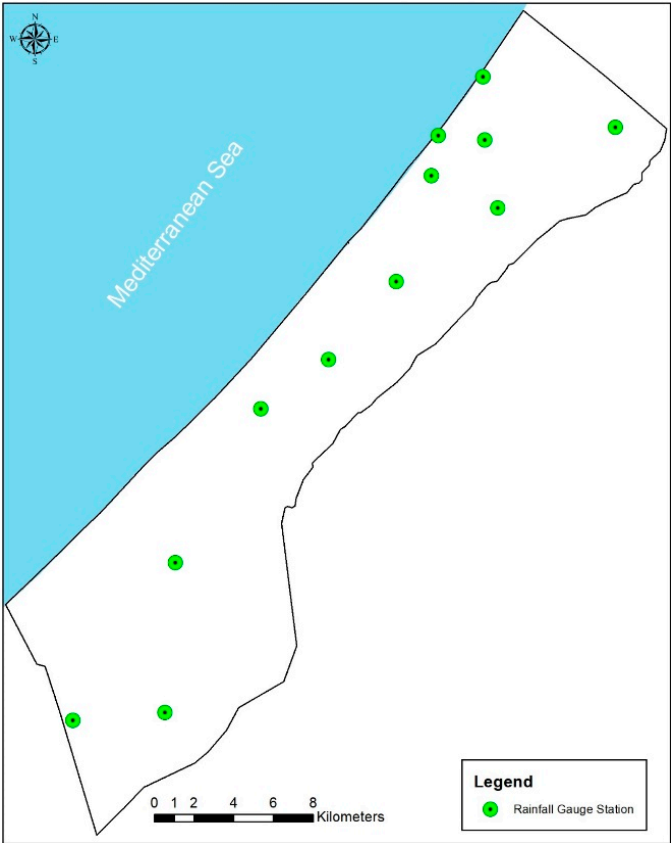

Figure S2. Rainfall stations location.

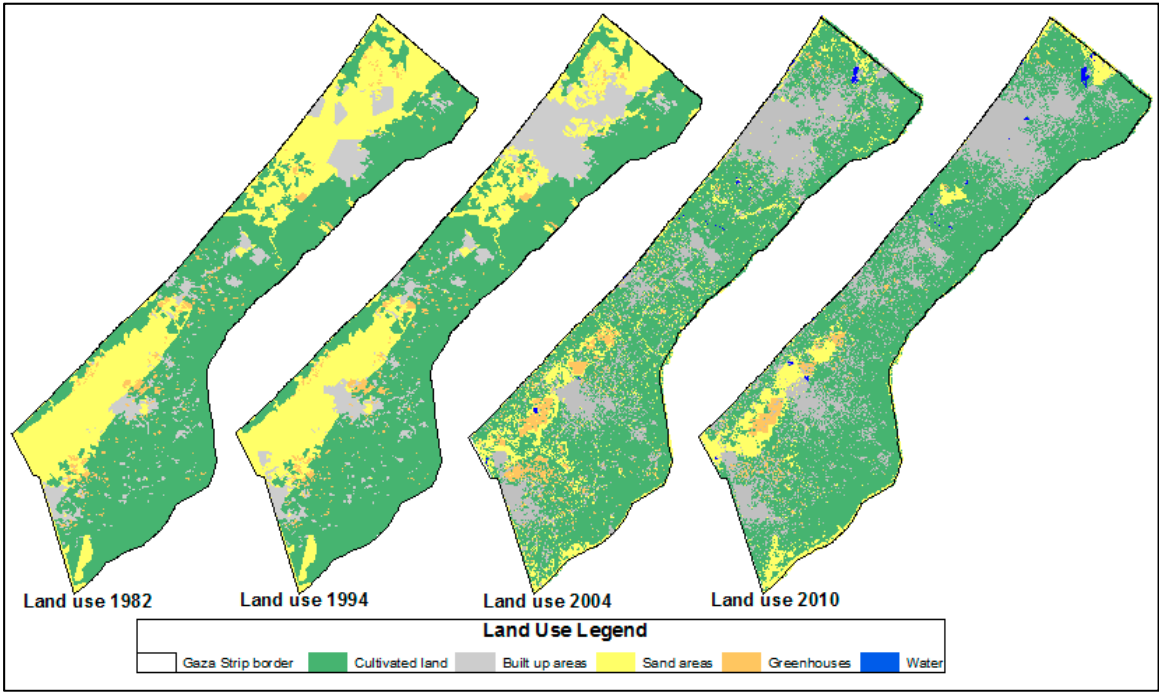

Figure S3. Land use maps in different years (Mushtaha et al., 2018).

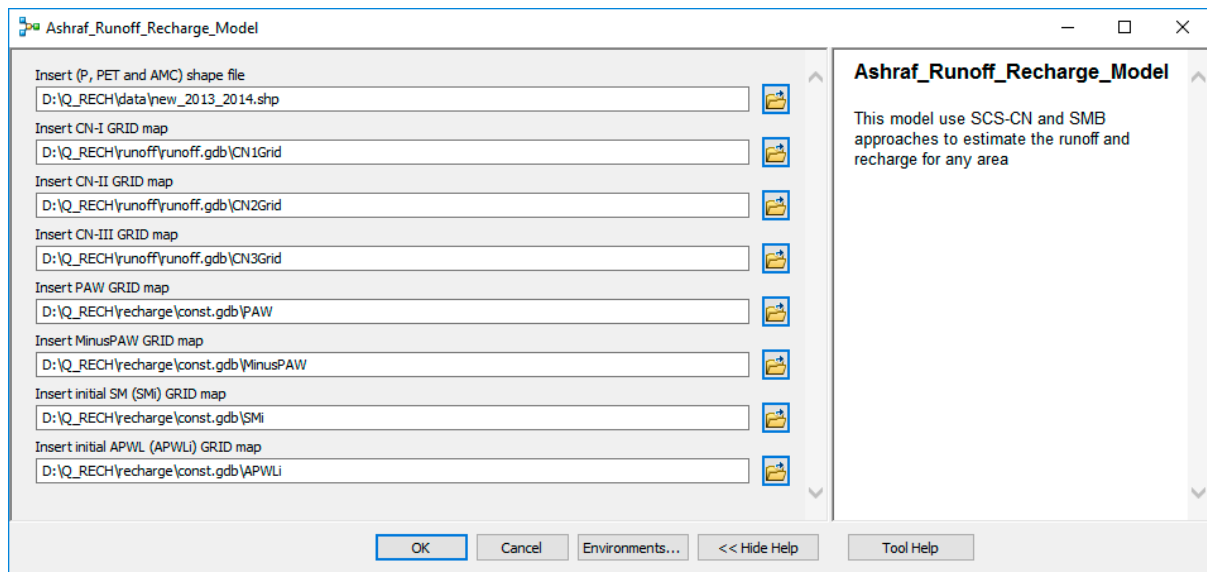

Figure S4. Screen shoot for developed new GIS tool for runoff and recharge estimations.

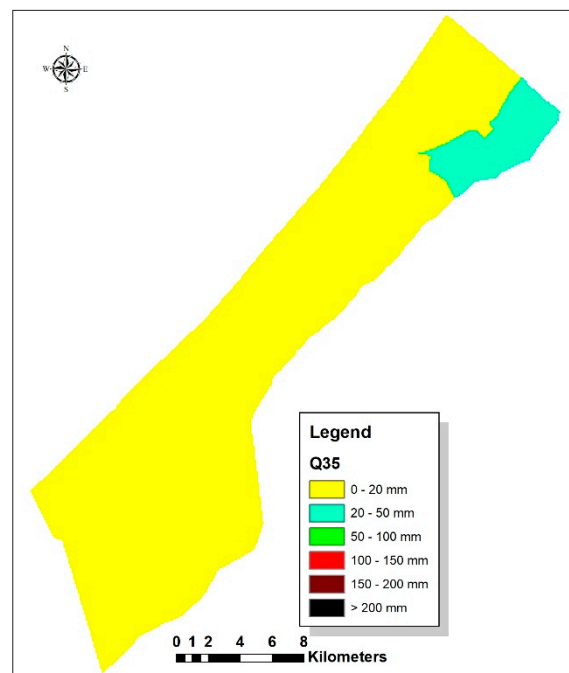

Figure S5. Spatial distribution of runoff in 1935.

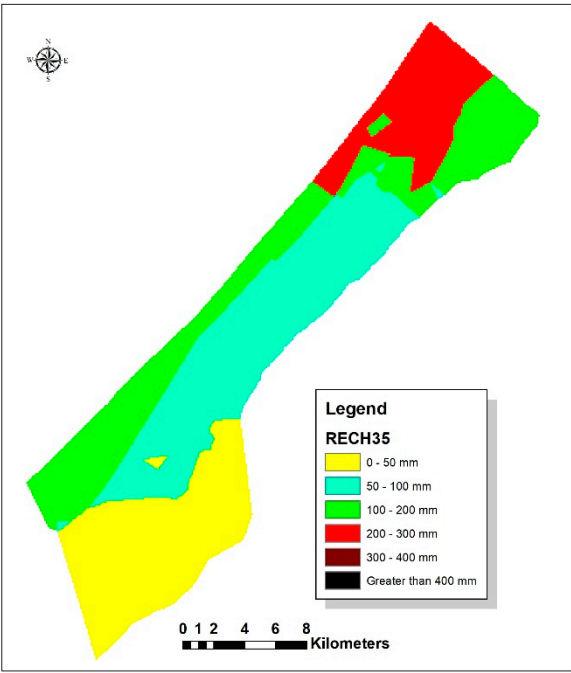

Figure S6. Spatial distribution of recharge in 1935.

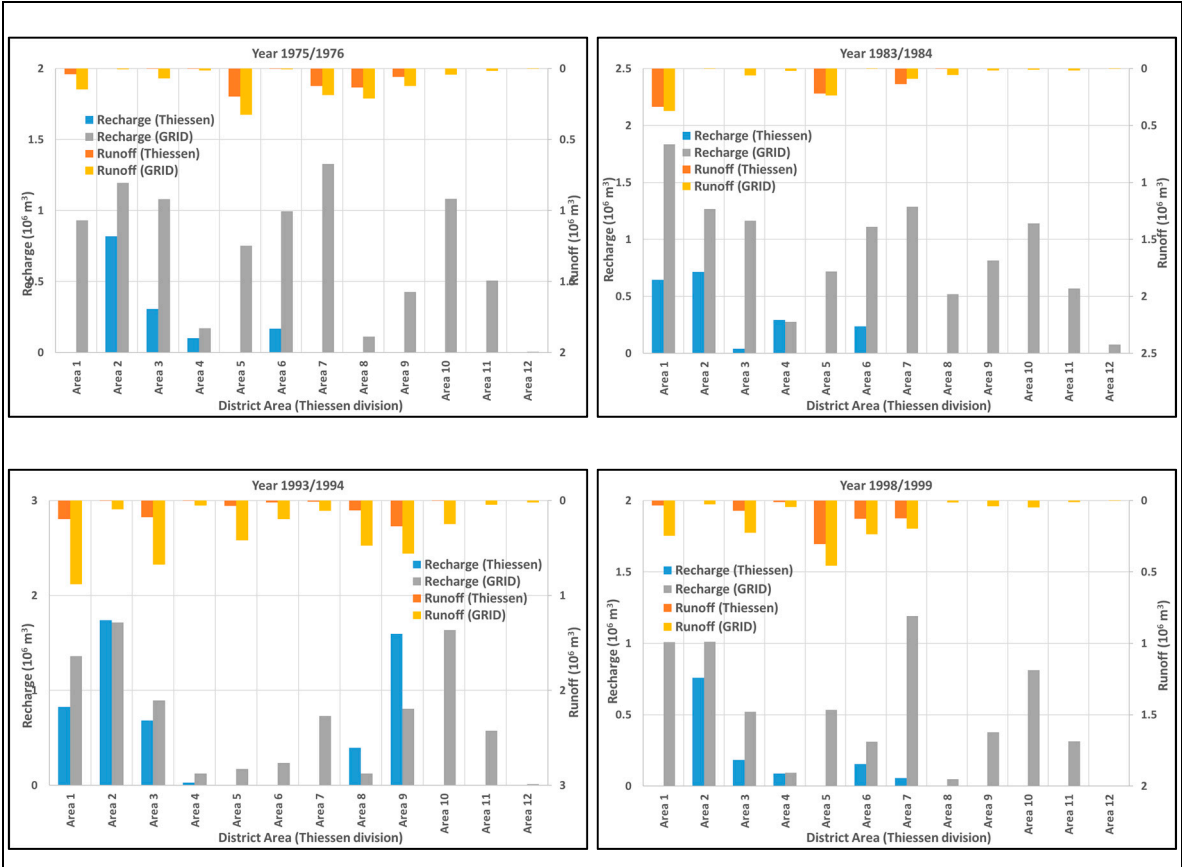

Figure S7. Recharge and runoff for selected years with rainfall less than long term average (326 mm).

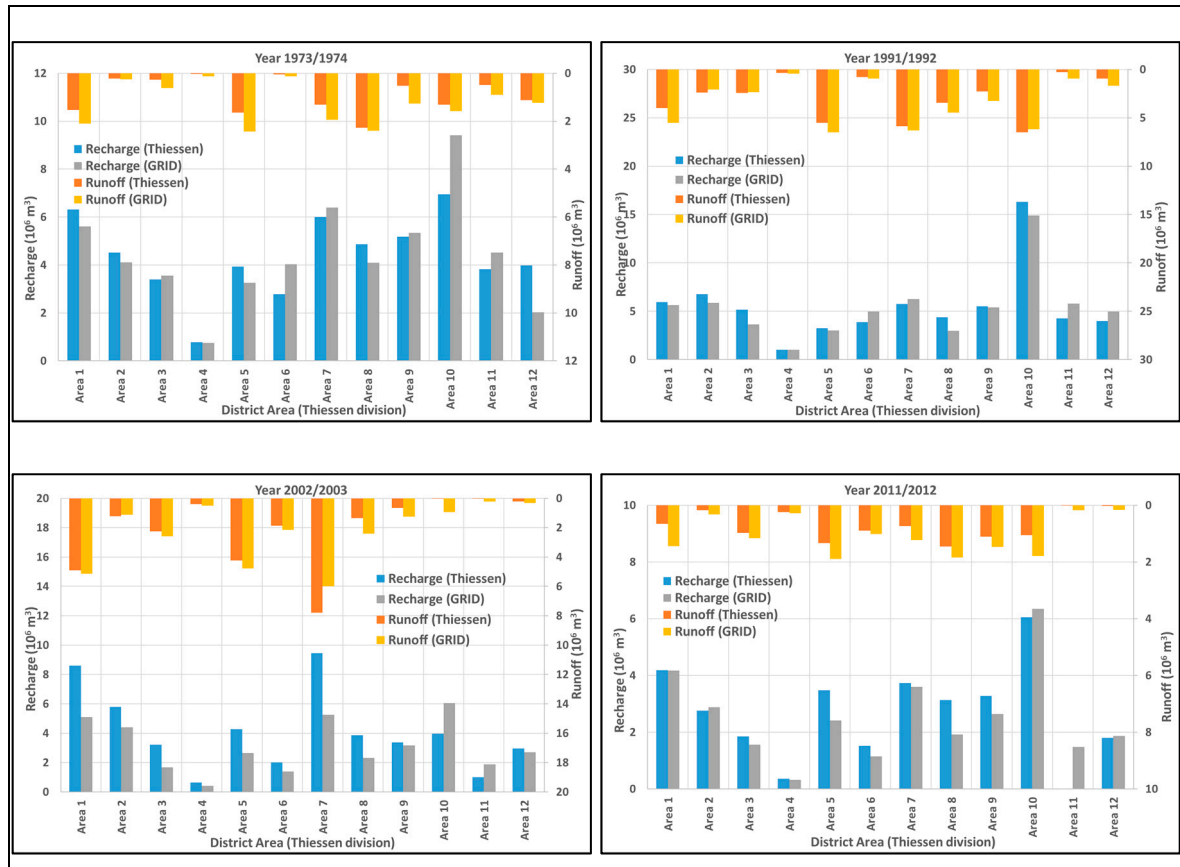

**Figure S8.** Recharge and runoff for selected years with rainfall greater than long term average (326 mm).

Annex I. Runoff GRID maps (1973 to 2016).

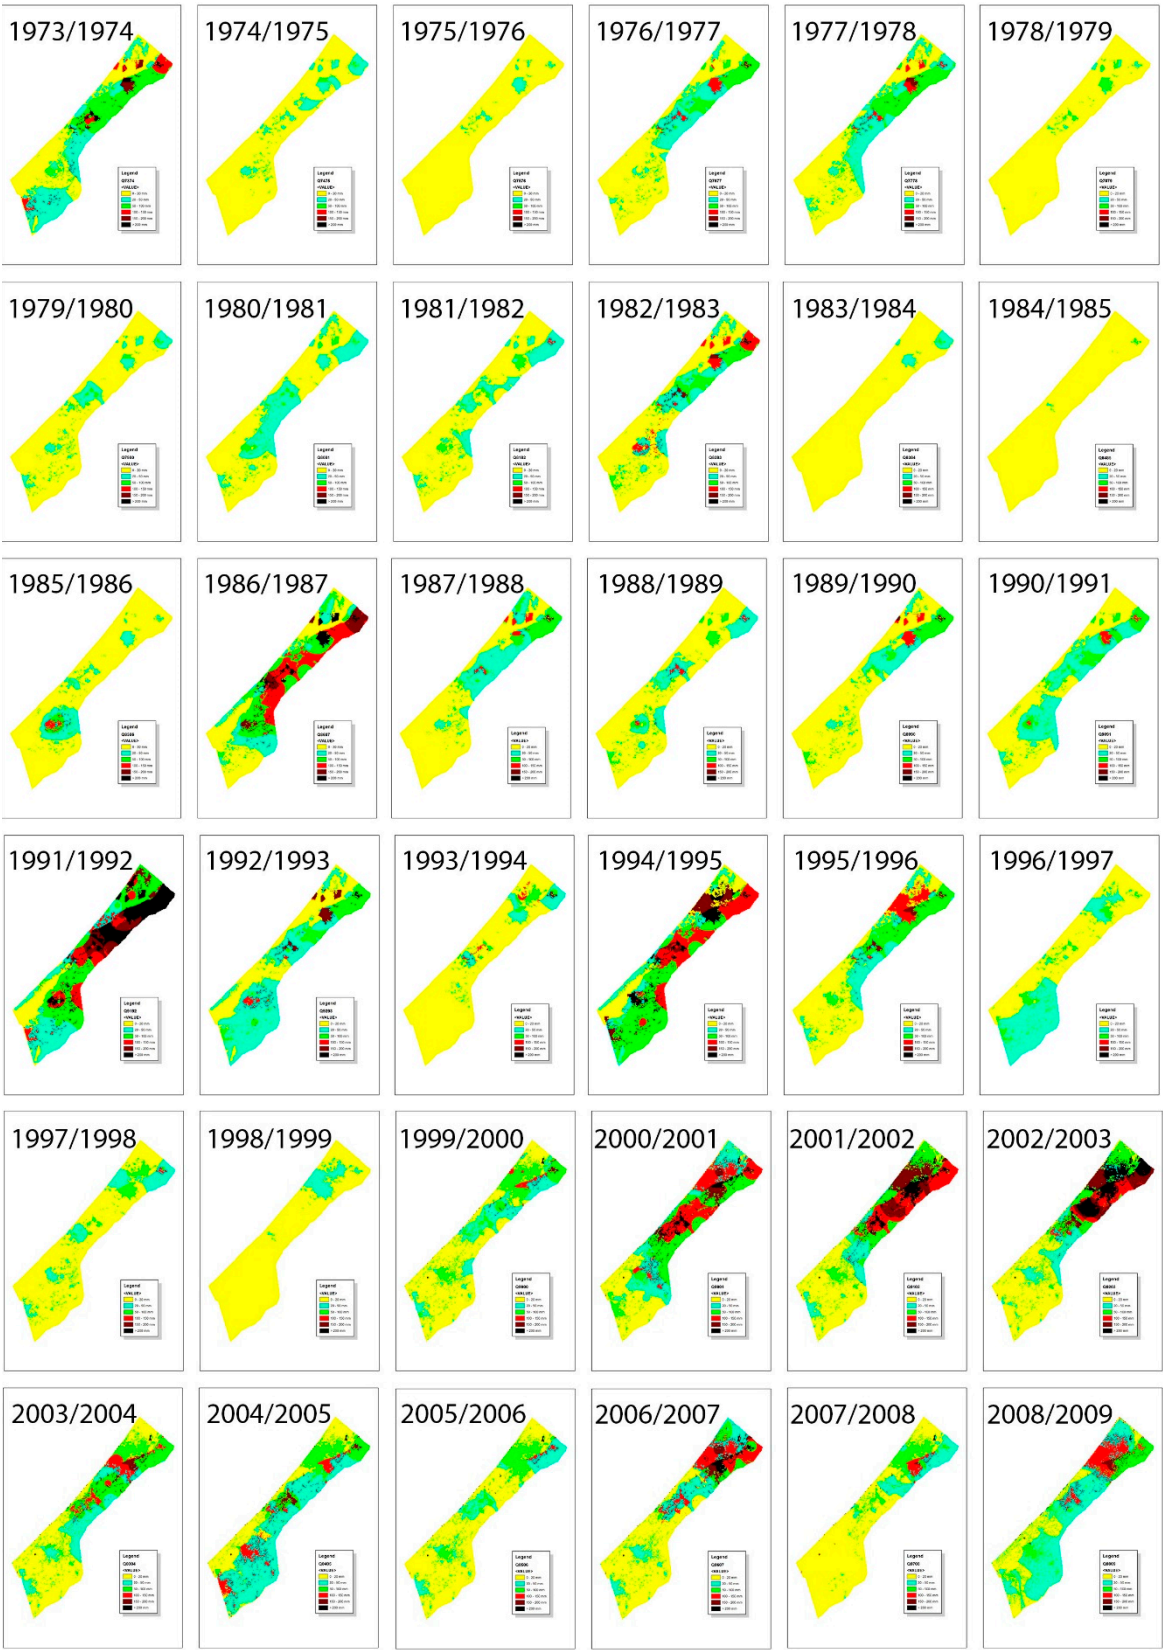

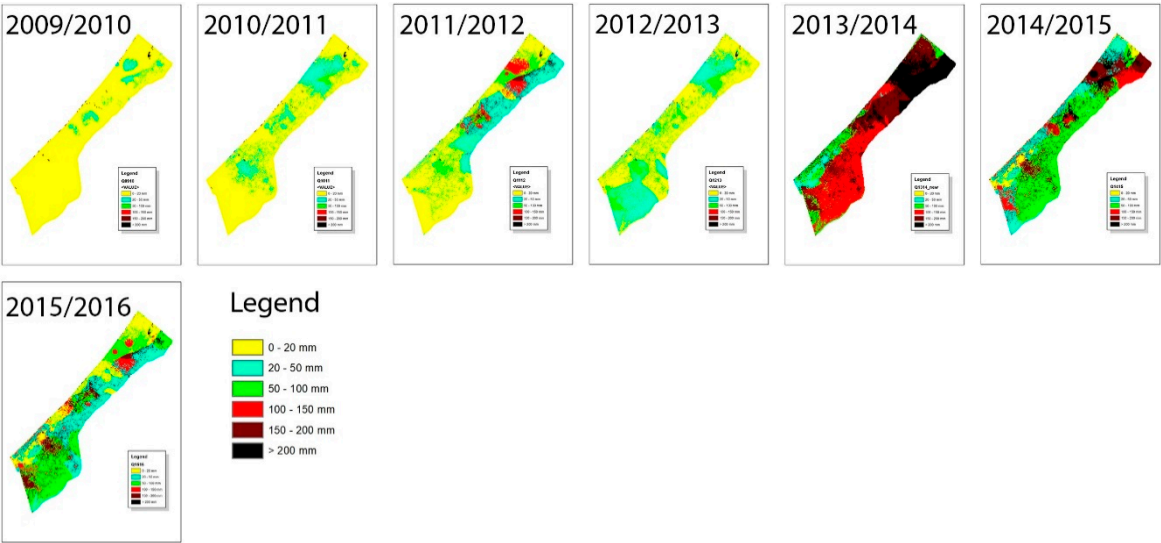



Annex II. Recharge GRID maps (1973 to 2016).

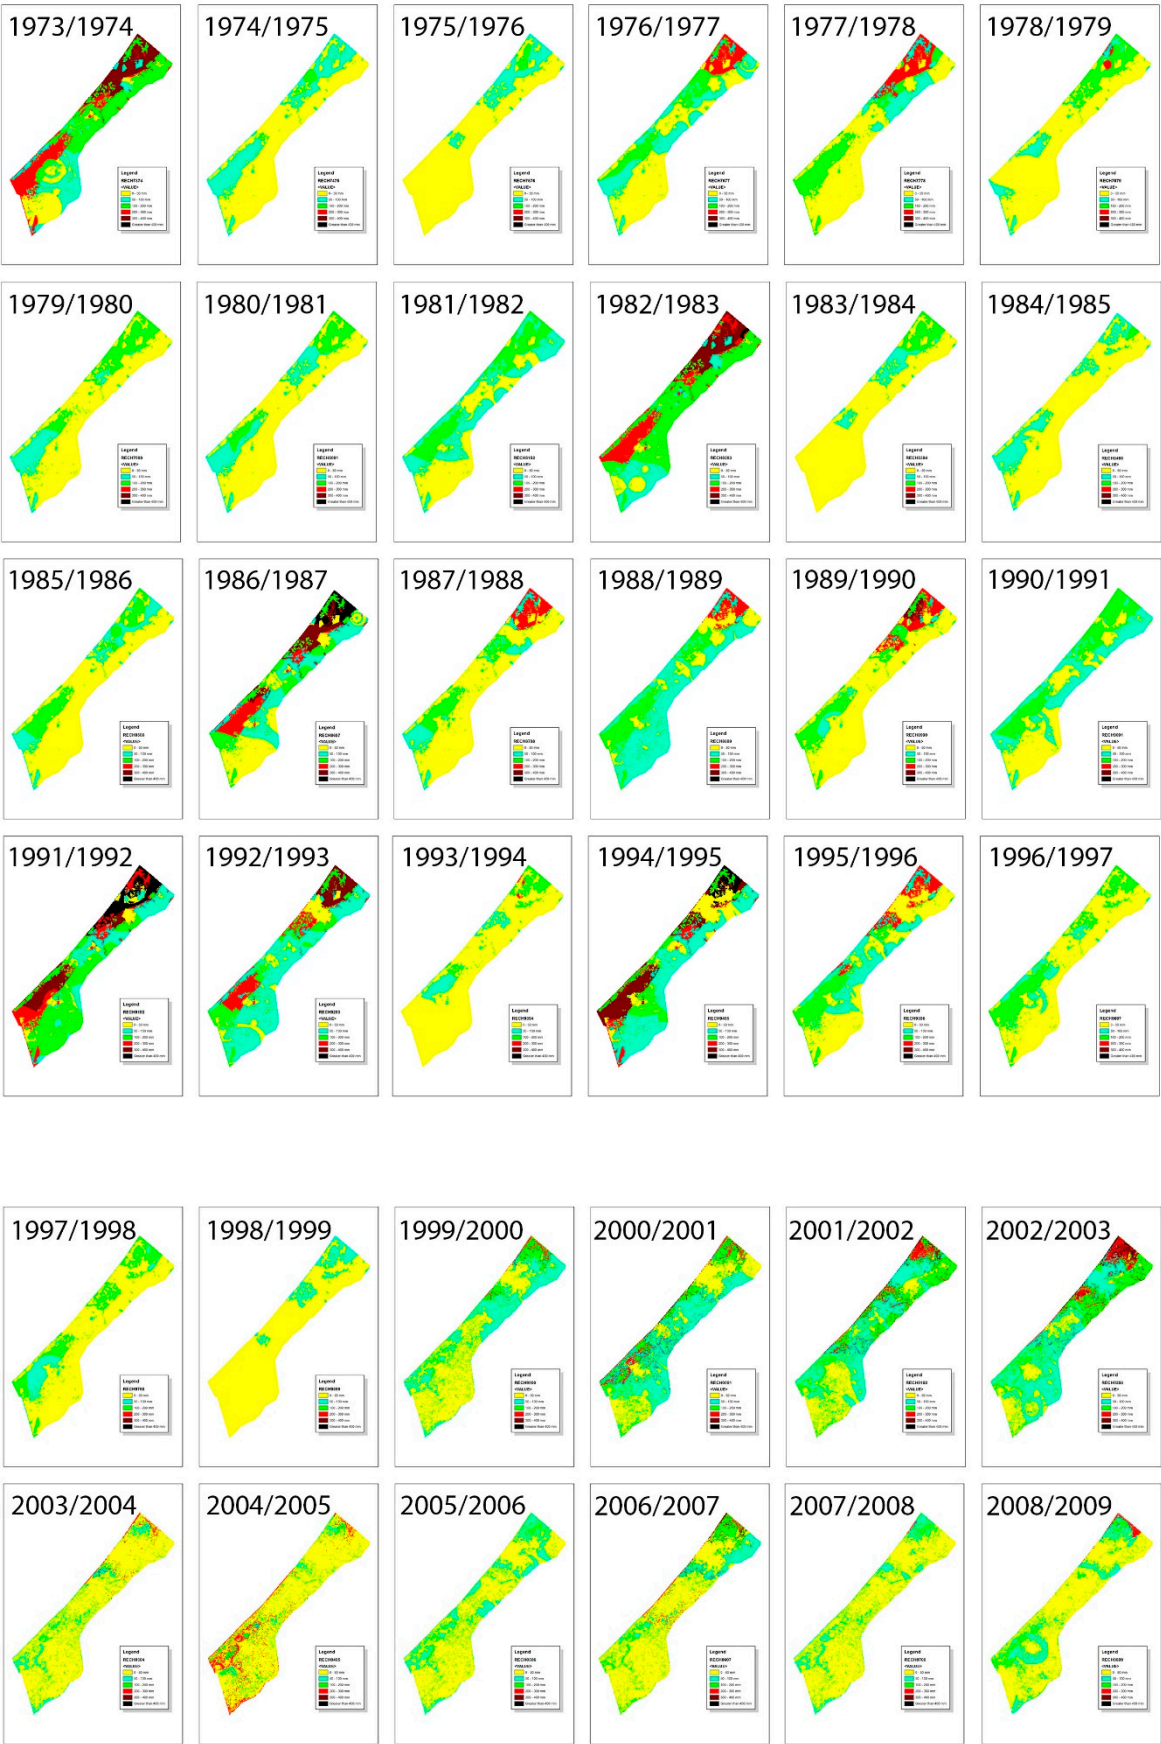



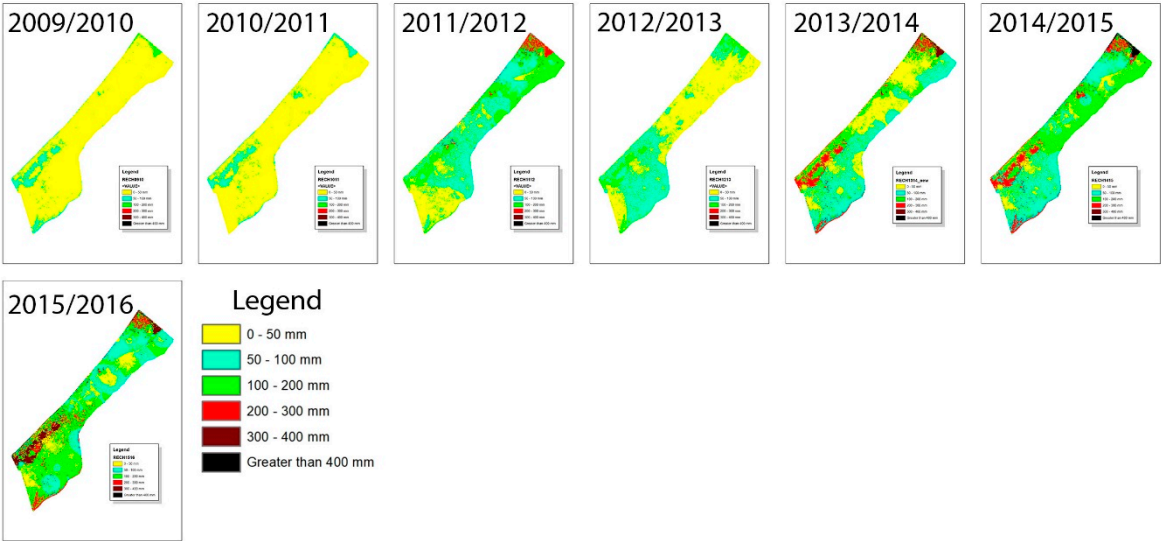

Supplement: s1 [file s1]
